# Supplementary material for: Virulence and Infectivity of UC, MD, and L Strains of Infectious Hematopoietic Necrosis Virus (IHNV) in Four Populations of Columbia River Basin Chinook Salmon
Source: MDPI journal article supplement (doi:10.3390/v13040701), 2021-04-18
Supplement: s1 [file s1]

Table S1. Cumulative percent survival (CPS) of triplicate groups of 20 juvenile spring-run and fall-run Chinook salmon of the upper (Up-) and lower (Low-) Columbia River Basin (CRB) exposed to L, UC and MD strains of IHNV. Experimental host populations were exposed to each virus strain at high ( $2 \times 10^5$  PFU ml<sup>-1</sup>) and moderate ( $2 \times 10^3$  PFU ml<sup>-1</sup>) doses by static immersion in 1 L. CPS is reported for individual replicate tanks (a, b, and c) at the end of the 30 d experimental trials.

| Columbia River Basin<br>Chinook salmon<br>population | Virus<br>strain | Genogroup,<br>subgroup | High Dose<br>Ind. rep. CPS |     |     | Moderate Dose<br>Ind. rep. CPS |     |     |
|------------------------------------------------------|-----------------|------------------------|----------------------------|-----|-----|--------------------------------|-----|-----|
|                                                      |                 |                        | a                          | b   | c   | a                              | b   | c   |
| Up-Spring                                            | FR0031          | L                      | 70                         | 30  | 65  | 95                             | 95  | 100 |
|                                                      | RB1             | UC                     | 90                         | 100 | 85  | 100                            | 95  | 100 |
|                                                      | QTS07           | MD                     | 95                         | 95  | 100 | 100                            | 95  | 95  |
| Up-Fall                                              | FR0031          | L                      | 55                         | 50  | 65  | 90                             | 65  | 70  |
|                                                      | RB1             | UC                     | 95                         | 90  | 95  | 100                            | 100 | 100 |
|                                                      | QTS07           | MD                     | 100                        | 100 | 100 | 95                             | 100 | 95  |
| Low-Spring                                           | FR0031          | L                      | 80                         | 85  | 85  | 100                            | 100 | 80  |
|                                                      | RB1             | UC                     | 100                        | 80  | 100 | 100                            | 100 | 80  |
|                                                      | QTS07           | MD                     | 100                        | 100 | 100 | 100                            | 100 | 100 |
| Low-Fall                                             | FR0031          | L                      | 75                         | 65  | 40  | 75                             | 95  | 75  |
|                                                      | RB1             | UC                     | 100                        | 95  | 100 | 95                             | 100 | 95  |
|                                                      | QTS07           | MD                     | 100                        | 100 | 95  | 85                             | 95  | 100 |

Table S2. Parameter estimates, with standard errors (SE), for evaluation of infection status using the full or reduced logistic regression models. The full regression model evaluated infection status against viral strain, exposure dose and host population (model 1). Reduced models omitted either host population (model 2), viral strain (model 3), or both (model 4). The full regression model was favored, as indicated by the lowest observable Akaike's information criterion (AIC).

|                       | Model 1  |      | Model 2  |      | Model 3  |      | Model 4  |      |
|-----------------------|----------|------|----------|------|----------|------|----------|------|
|                       | Estimate | SE   | Estimate | SE   | Estimate | SE   | Estimate | SE   |
| $\beta_0$             | -6.65192 | 0.73 | -6.402   | 0.66 | -6.89648 | 0.71 | -6.6437  | 0.65 |
| $\beta_{\text{dose}}$ | 1.66842  | 0.16 | 1.5996   | 0.16 | 1.64075  | 0.16 | 1.5747   | 0.15 |
| $\alpha_4$            | 0.67208  | 0.39 | -        | -    | 0.66162  | 0.39 | -        | -    |
| $\alpha_3$            | -0.07554 | 0.39 | -        | -    | -0.07434 | 0.39 | -        | -    |
| $\alpha_2$            | -0.69391 | 0.40 | -        | -    | -0.68281 | 0.39 | -        | -    |
| $\gamma_m$            | -0.33893 | 0.34 | -0.3258  | 0.33 | -        | -    | -        | -    |
| $\gamma_u$            | -0.74167 | 0.34 | -0.7127  | 0.34 | -        | -    | -        | -    |
| AIC#                  | 342.05   |      | 348.18   |      | 342.85   |      | 348.79   |      |

Table S3. Parameter estimates, with standard errors (SE), for evaluation of viral loads using the full or reduced generalized linear models (GLMs). The complex GLM evaluated log viral load outcome against viral strain, exposure dose and host population (model 1). Reduced models omitted either host population (model 2), viral strain (model 3), or both (model 4). The complex GLM was favored, as indicated by the lowest observable Akaike's information criterion (AIC).

|                       | Model 1  |      | Model 2  |      | Model 3  |      | Model 4  |      |
|-----------------------|----------|------|----------|------|----------|------|----------|------|
|                       | Estimate | SE   | Estimate | SE   | Estimate | SE   | Estimate | SE   |
| $\beta_0$             | 5.56222  | 0.54 | 5.1885   | 0.54 | 5.4302   | 0.53 | 4.9953   | 0.53 |
| $\beta_{\text{dose}}$ | 0.17506  | 0.11 | 0.1992   | 0.11 | 0.1692   | 0.11 | 0.1954   | 0.11 |
| $\alpha_4$            | -0.60047 | 0.23 | -        | -    | -0.6487  | 0.23 | -        | -    |
| $\alpha_3$            | -0.47253 | 0.24 | -        | -    | -0.4854  | 0.24 | -        | -    |
| $\alpha_2$            | 0.09666  | 0.26 | -        | -    | 0.0344   | 0.26 | -        | -    |
| $\gamma_m$            | -0.19495 | 0.20 | -0.2507  | 0.20 | -        | -    | -        | -    |
| $\gamma_u$            | -0.4267  | 0.21 | -0.4363  | 0.21 | -        | -    | -        | -    |
| AIC#                  | 459.94   |      | 466.55   |      | 460.28   |      | 466.93   |      |
